# Supplementary material for: Global estimates of reactive nitrogen components during 2000–2100 based on the multi-stage model
Source: Copernicus journal article supplement (doi:10.5194/egusphere-2024-69), 2024-03-05

# *Supplementary Information*

**Title: Global estimates of ambient reactive nitrogen components during 2000-2100 based on the multi-stage model**

**Authors:** Rui Li<sup>a, b \*</sup>, Yining Gao<sup>a</sup>, Lijia Zhang<sup>a</sup>, Yubing Shen<sup>a</sup>, Gehui Wang<sup>a</sup>

**Affiliations:** <sup>a</sup> *Key Laboratory of Geographic Information Science of the Ministry of Education, School of Geographic Sciences, East China Normal University, Shanghai, 200241, PR China*

<sup>b</sup> *Institute of Eco-Chongming (IEC), 20 Cuiniao Road, Chenjia Town, Chongming District, Shanghai, 202162, China*

**\* Corresponding author**

Prof. Li ([rli@geo.ecnu.edu.cn](mailto:rli@geo.ecnu.edu.cn))

Number of pages: 18

Number of figures: 16

Number of tables: 1

**Table S1** The basic information and data sources of variables for N-bearing component estimates.

| Dataset                             | Variable                     | Unit                 | Spatial resolution | Time resolution | Data source                    |
|-------------------------------------|------------------------------|----------------------|--------------------|-----------------|--------------------------------|
| N-bearing components                | NO <sub>3</sub> <sup>-</sup> | μg/m <sup>3</sup>    | --                 | Monthly         | NNDMN,                         |
|                                     | HNO <sub>3</sub>             | μg/m <sup>3</sup>    | --                 | Monthly         | EANET,                         |
|                                     | NH <sub>3</sub>              | μg/m <sup>3</sup>    | --                 | Monthly         | EMEP, and                      |
|                                     | NH <sub>4</sub> <sup>+</sup> | μg/m <sup>3</sup>    | --                 | Monthly         | CASTNET                        |
| NO <sub>2</sub> tropospheric column | NO <sub>2</sub> column       | mole/cm <sup>2</sup> | 0.25°              | Daily           | NASA                           |
| NH <sub>3</sub> column              | NH <sub>3</sub> column       | mol/cm <sup>2</sup>  | 0.5°               | Daily           | ISAI                           |
| Meteorology                         | D <sub>2m</sub>              | °C                   | 0.25°              | 6-hour          | ERA-Interim reanalysis product |
|                                     | T <sub>2m</sub>              | °C                   | 0.25°              | 6-hour          |                                |
|                                     | U <sub>10</sub>              | m/s                  | 0.25°              | 6-hour          |                                |
|                                     | V <sub>10</sub>              | m/s                  | 0.25°              | 6-hour          |                                |
|                                     | BLH                          | m                    | 0.25°              | 3-hour          |                                |
|                                     | Sund                         | s                    | 0.25°              | 6-hour          |                                |
|                                     | Sp                           | hPa                  | 0.25°              | 6-hour          |                                |
|                                     | Tp                           | mm                   | 0.25°              | 6-hour          |                                |
| Land use types                      | Barren land                  | m <sup>2</sup>       | 30 m               | Annually        | Liu et al. (2020)              |
|                                     | Grassland                    | m <sup>2</sup>       | 30 m               | Annually        |                                |
|                                     | Shrubland                    | m <sup>2</sup>       | 30 m               | Annually        |                                |
|                                     | Forest                       | m <sup>2</sup>       | 30 m               | Annually        |                                |
|                                     | Cropland                     | m <sup>2</sup>       | 30 m               | Annually        |                                |
|                                     | Tundra                       | m <sup>2</sup>       | 30 m               | Annually        |                                |
|                                     | Snow/ice                     | m <sup>2</sup>       | 30 m               | Annually        |                                |
| Elevation                           | DEM                          | m                    | 30 m               | --              | ETOPO                          |

**Table S2** Available (O) and not available (X) CMIP6 Global Climate Models used in our study.

|               | SSP1-2.6 | SSP2-4.5 | SSP3-7.0 | SSP8.5 |
|---------------|----------|----------|----------|--------|
| ACCESS-ESM1-5 | O        | O        | O        | O      |
| CanESM5       | O        | O        | O        | O      |
| CESM2-WACCM   | O        | O        | O        | O      |
| CMCC-CM2-SR5  | O        | O        | O        | O      |
| EC-Earth3-Veg | O        | O        | O        | O      |
| EC-Earth3-CC  | X        | O        | X        | O      |
| FGOALS-f3-L   | O        | O        | O        | O      |
| FGOALS-g      | O        | O        | O        | O      |
| GFDL-ESM4     | O        | O        | O        | O      |
| INM-CM5-0     | O        | O        | O        | O      |
| IPSL-CM6A-LR  | O        | X        | X        | X      |
| MIROC6        | O        | O        | O        | O      |
| MPI-ESM1-2-HR | O        | O        | O        | O      |
| MRI-ESM2-0    | O        | O        | O        | O      |
| Nor-ESM2-LM   | O        | O        | O        | O      |
| NorESM2-MM    | O        | O        | O        | O      |

**Figure S1** The spatial distribution of monitoring sites of reactive nitrogen components at the global scale. The color bar reflects the map of global terrain (altitude).

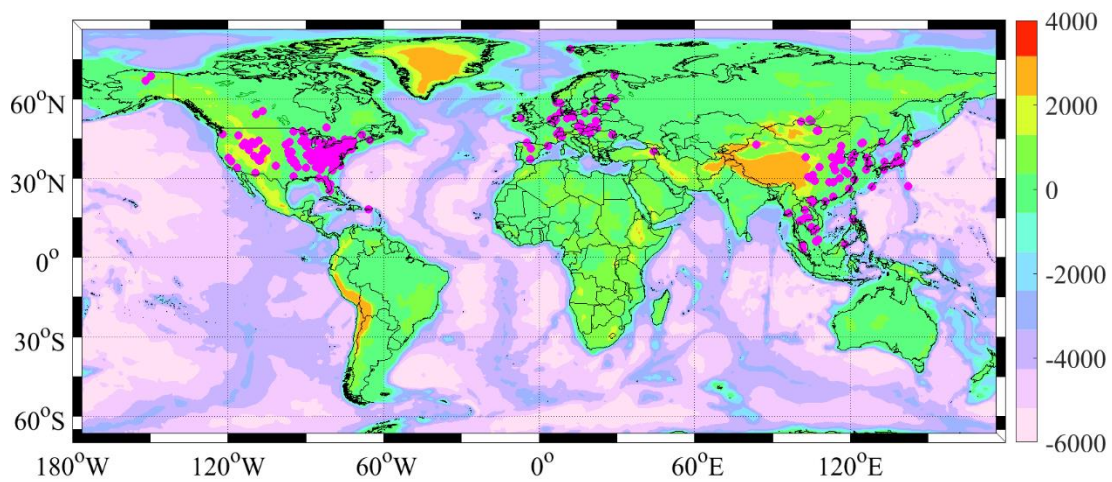

**Figure S2** The predictive performances of four N-bearing components including  $\text{NO}_3^-$  (a),  $\text{HNO}_3$  (b),  $\text{NH}_3$  (c), and  $\text{NH}_4^+$  (d) based on ensemble model. The model was constructed with 90% original data and the remained data was applied to validate the model. The black solid line denotes the best-fitting curve for all of the points, while the black dashed line represents the diagonal, which means the same observed and simulated values.

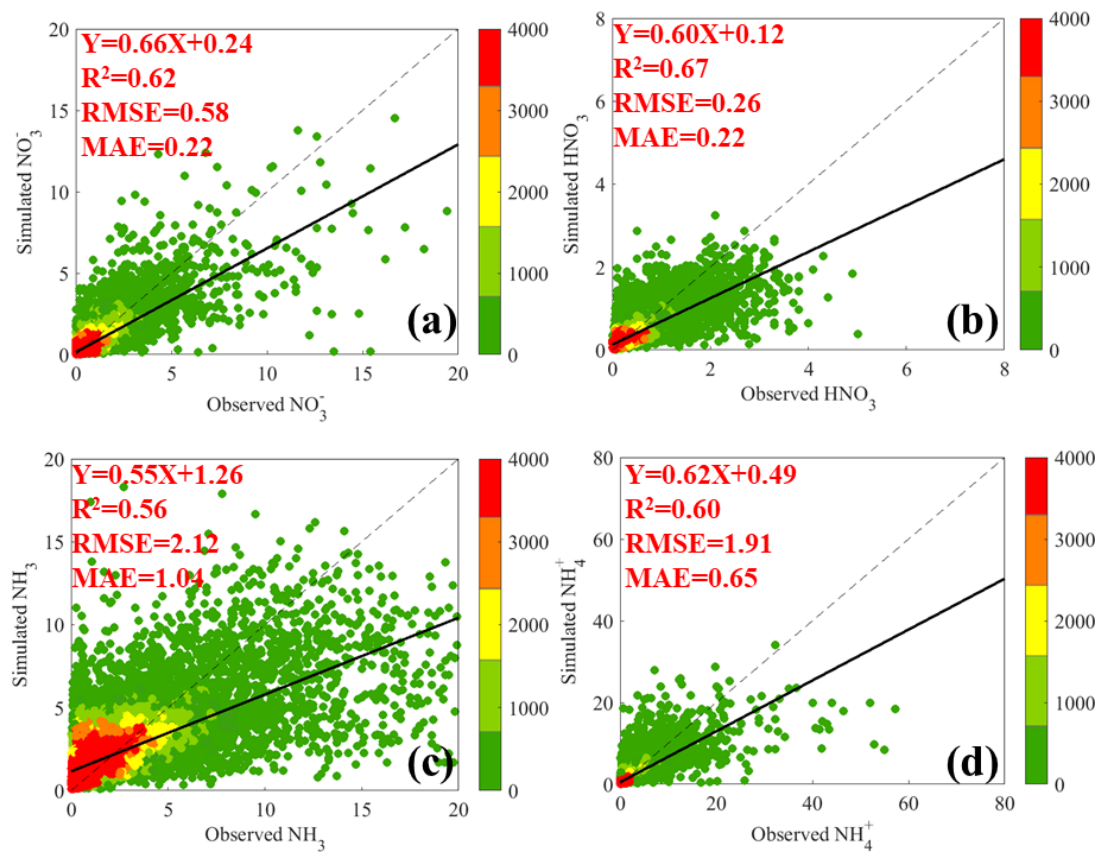

**Figure S3** The annual mean concentrations of  $\text{NO}_3^-$  (a),  $\text{HNO}_3$  (b),  $\text{NH}_3$  (c), and  $\text{NH}_4^+$  (d) at the global scale (Unit:  $\mu\text{g N m}^{-3}$ ).

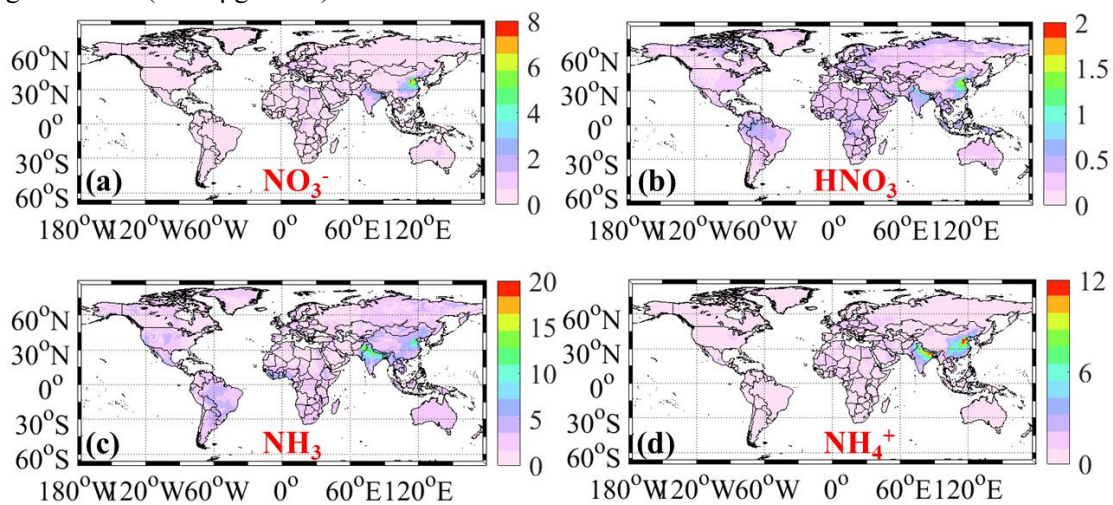

**Figure S4** The seasonal variations of  $\text{NO}_3^-$  levels at the global scale (Unit:  $\mu\text{g N m}^{-3}$ ).

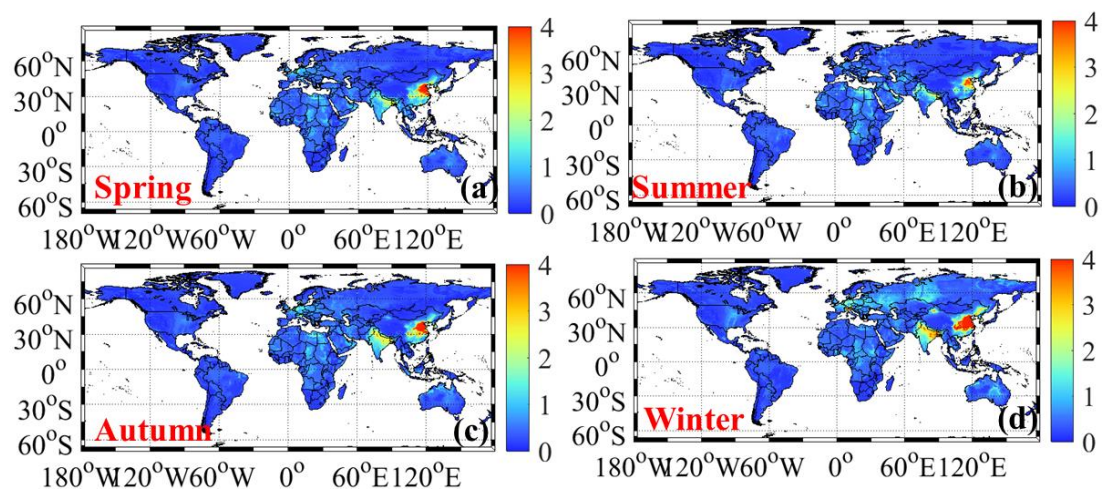

**Figure S5** The seasonal variations of HNO<sub>3</sub> levels at the global scale (Unit:  $\mu\text{g N m}^{-3}$ ).

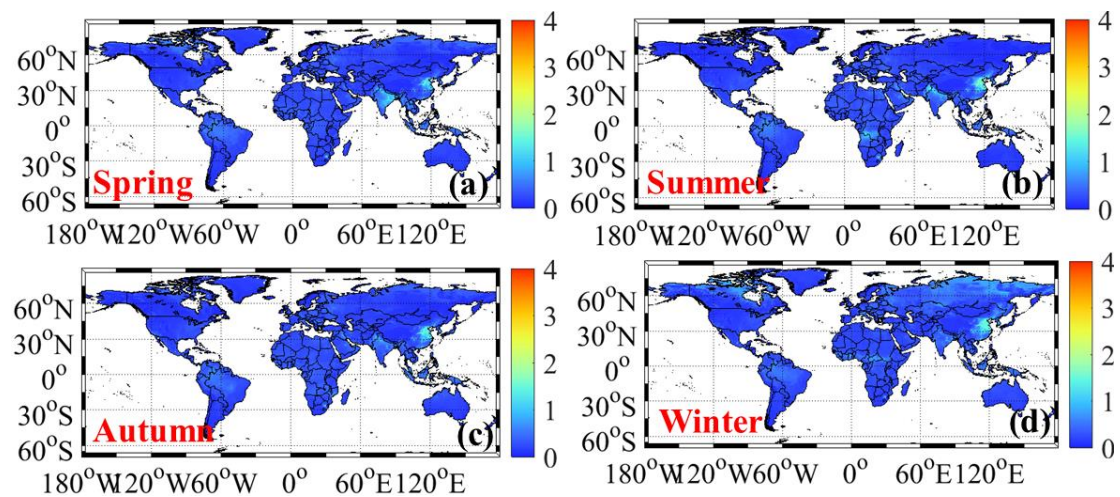



**Figure S6** The seasonal variations of  $\text{NH}_3$  levels at the global scale (Unit:  $\mu\text{g N m}^{-3}$ ).

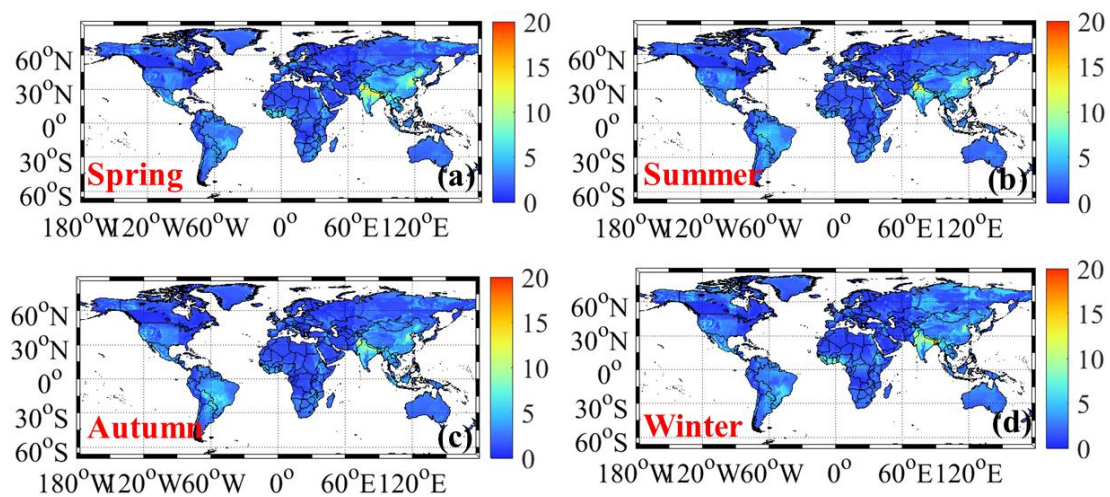

**Figure S7** The seasonal variations of  $\text{NH}_4^+$  levels at the global scale (Unit:  $\mu\text{g N m}^{-3}$ ).

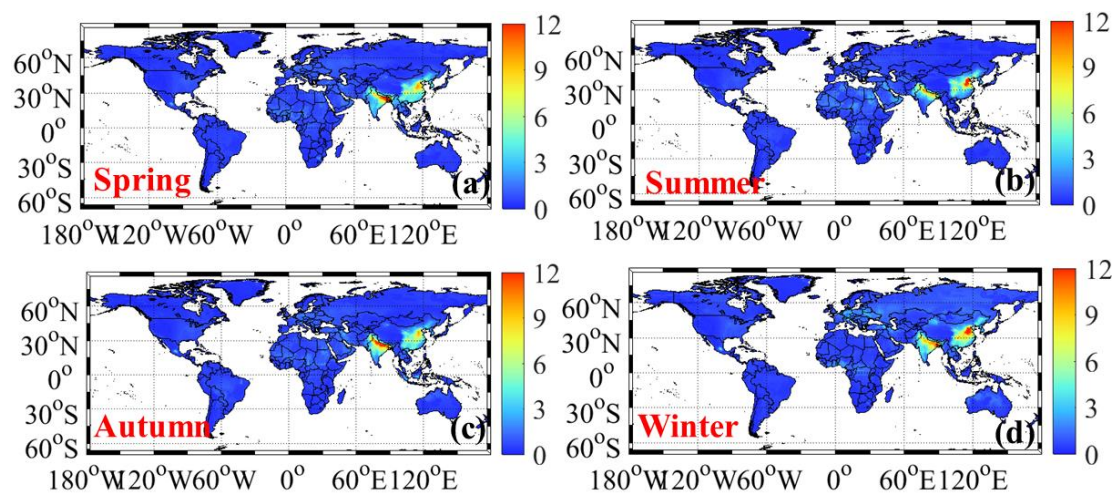

**Figure S8** The monthly variations of  $\text{NO}_3^-$ ,  $\text{HNO}_3$ ,  $\text{NH}_3$ , and  $\text{NH}_4^+$  in China, Europe, and the United States (Unit:  $\mu\text{g N m}^{-3}$ )

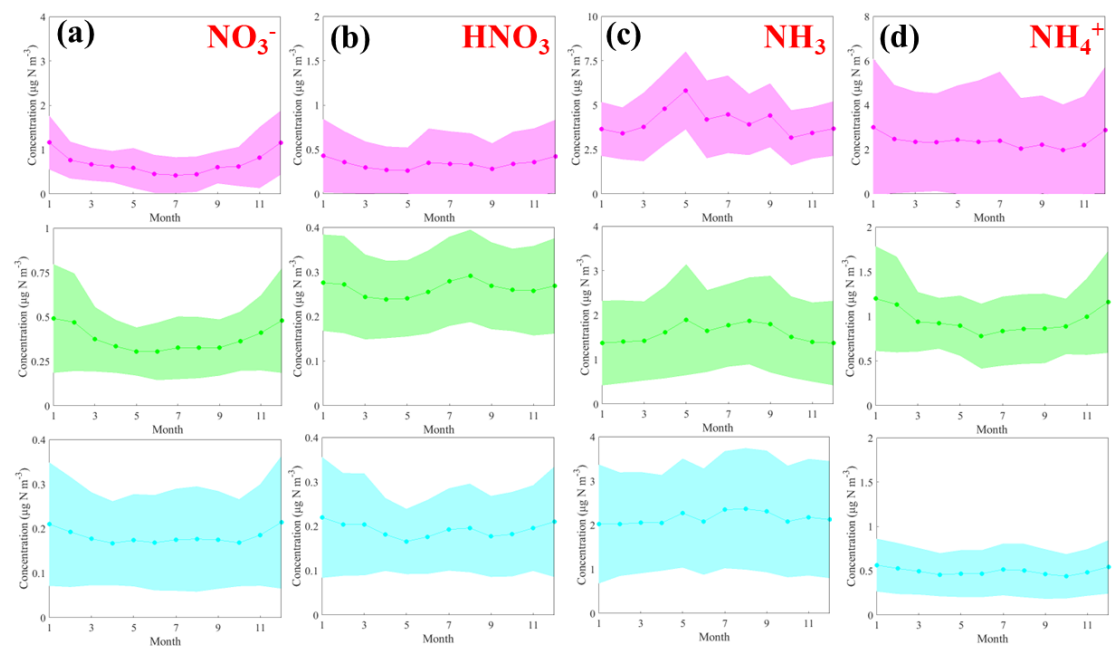

**Figure S9** The yearly variations of  $\text{NO}_3^-$  (a),  $\text{HNO}_3$  (b),  $\text{NH}_3$  (c), and  $\text{NH}_4^+$  (d) concentrations around the world during 2000-2019 (Unit:  $\mu\text{g N m}^{-3}/\text{yr}$ ).

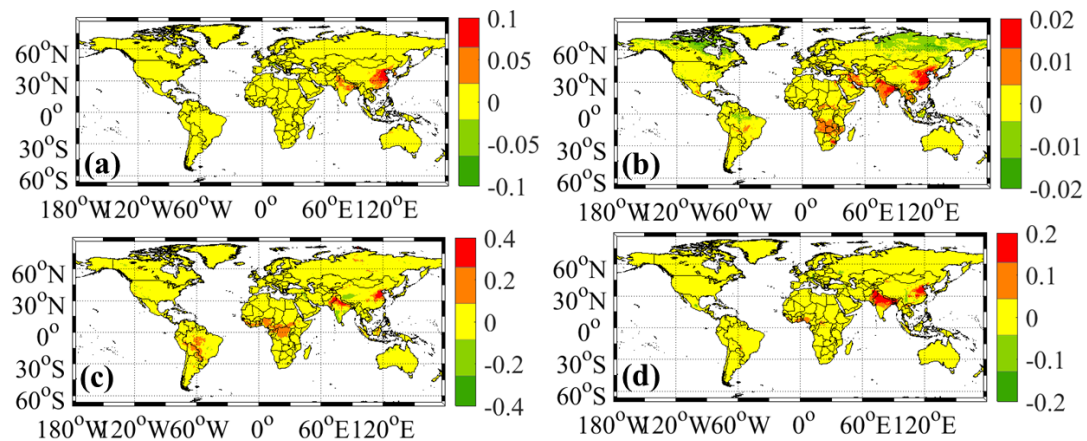

**Figure S10** The yearly variations of  $\text{NO}_3^-$  (a),  $\text{HNO}_3$  (b),  $\text{NH}_3$  (c), and  $\text{NH}_4^+$  (d) concentrations around the world during 2000-2007 (Unit:  $\mu\text{g N m}^{-3}/\text{yr}$ ).

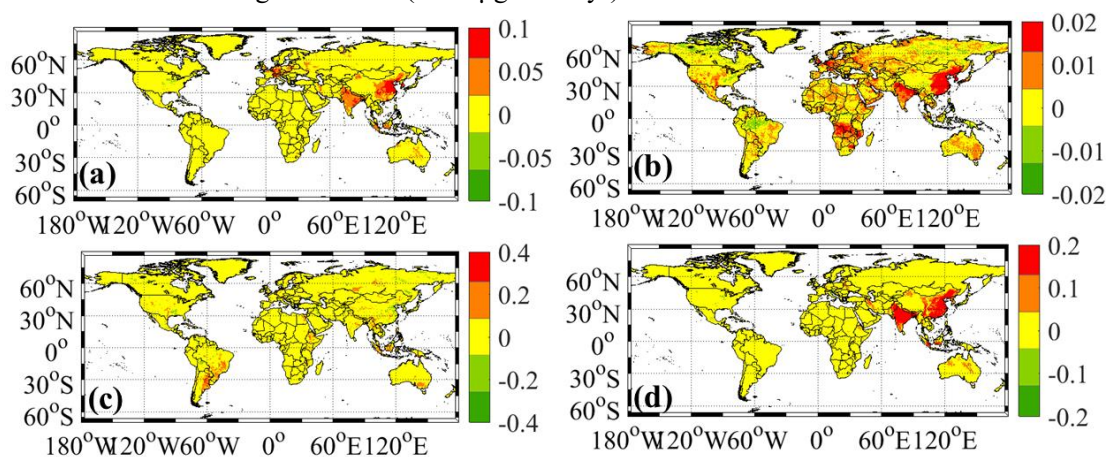

**Figure S11** The yearly variations of  $\text{NO}_3^-$  (a),  $\text{HNO}_3$  (b),  $\text{NH}_3$  (c), and  $\text{NH}_4^+$  (d) concentrations around the world during 2007-2013 (Unit:  $\mu\text{g N m}^{-3}/\text{yr}$ ).

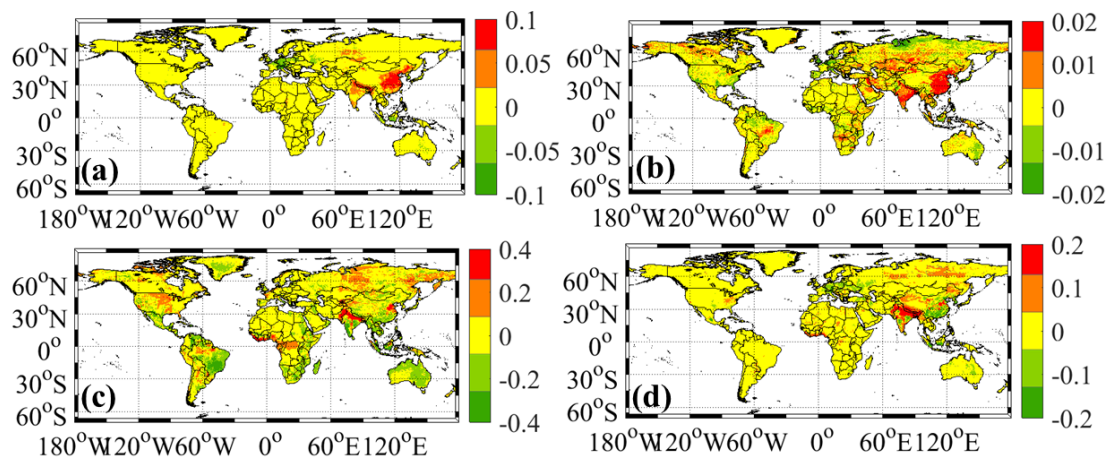

**Figure S12** The yearly variations of  $\text{NO}_3^-$  (a),  $\text{HNO}_3$  (b),  $\text{NH}_3$  (c), and  $\text{NH}_4^+$  (d) concentrations around the world during 2013-2019 (Unit:  $\mu\text{g N m}^{-3}/\text{yr}$ ).

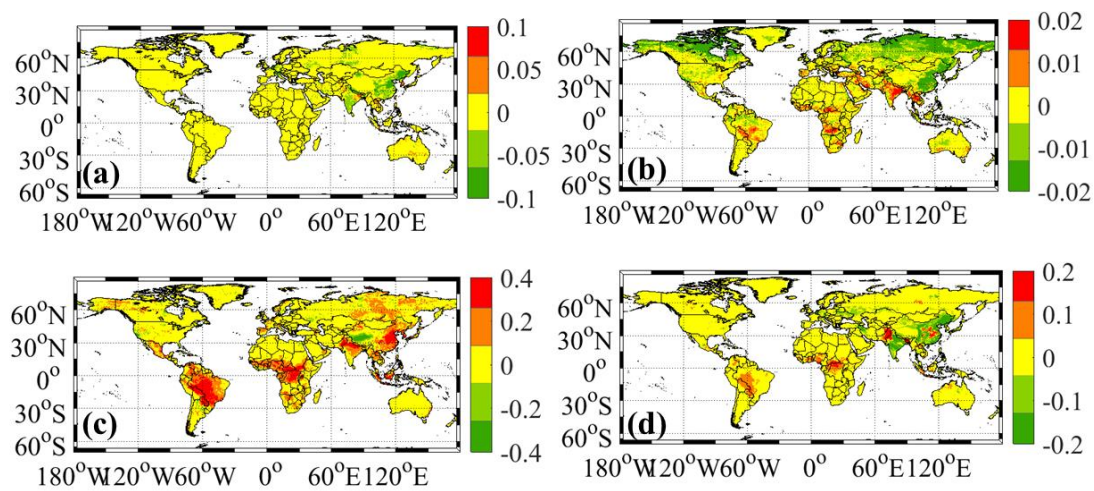

**Figure S13** Spatial variations of projected global ambient  $\text{NO}_3^-$  concentrations under different climate change scenarios (Unit:  $\mu\text{g N m}^{-3}$ ). Panels (a-d) represent the annual mean concentrations of  $\text{NO}_3^-$  concentrations for 2030s (2021-2050 average), 2050s (2041-2070 average), 2070s (2061-2090 average), and 2080s (2071-2100 average) under SSP1-2.6 scenarios. Panels (e-h) represent the annual mean concentrations of  $\text{NO}_3^-$  concentrations for 2030s (2021-2050 average), 2050s (2041-2070 average), 2070s (2061-2090 average), and 2080s (2071-2100 average) under SSP2-4.5 scenarios. Panels (i-l) represent the annual mean concentrations of  $\text{NO}_3^-$  concentrations for 2030s (2021-2050 average), 2050s (2041-2070 average), 2070s (2061-2090 average), and 2080s (2071-2100 average) under SSP3-7.0 scenarios. Panels (m-p) represent the annual mean concentrations of  $\text{NO}_3^-$  concentrations for 2030s (2021-2050 average), 2050s (2041-2070 average), 2070s (2061-2090 average), and 2080s (2071-2100 average) under SSP5-8.5 scenarios.

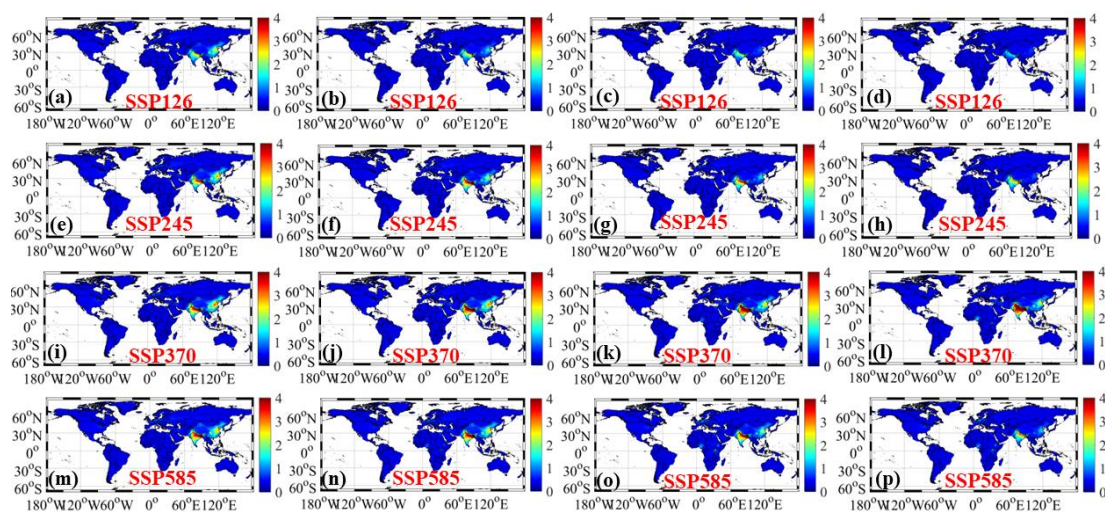



**Figure S14** Spatial variations of projected global ambient HNO<sub>3</sub> concentrations under different climate change scenarios (Unit:  $\mu\text{g N m}^{-3}$ ). Panels (a-d) represent the annual mean concentrations of HNO<sub>3</sub> concentrations for 2030s (2021-2050 average), 2050s (2041-2070 average), 2070s (2061-2090 average), and 2080s (2071-2100 average) under SSP1-2.6 scenarios. Panels (e-h) represent the annual mean concentrations of HNO<sub>3</sub> concentrations for 2030s (2021-2050 average), 2050s (2041-2070 average), 2070s (2061-2090 average), and 2080s (2071-2100 average) under SSP2-4.5 scenarios. Panels (i-l) represent the annual mean concentrations of HNO<sub>3</sub> concentrations for 2030s (2021-2050 average), 2050s (2041-2070 average), 2070s (2061-2090 average), and 2080s (2071-2100 average) under SSP3-7.0 scenarios. Panels (m-p) represent the annual mean concentrations of HNO<sub>3</sub> concentrations for 2030s (2021-2050 average), 2050s (2041-2070 average), 2070s (2061-2090 average), and 2080s (2071-2100 average) under SSP5-8.5 scenarios.

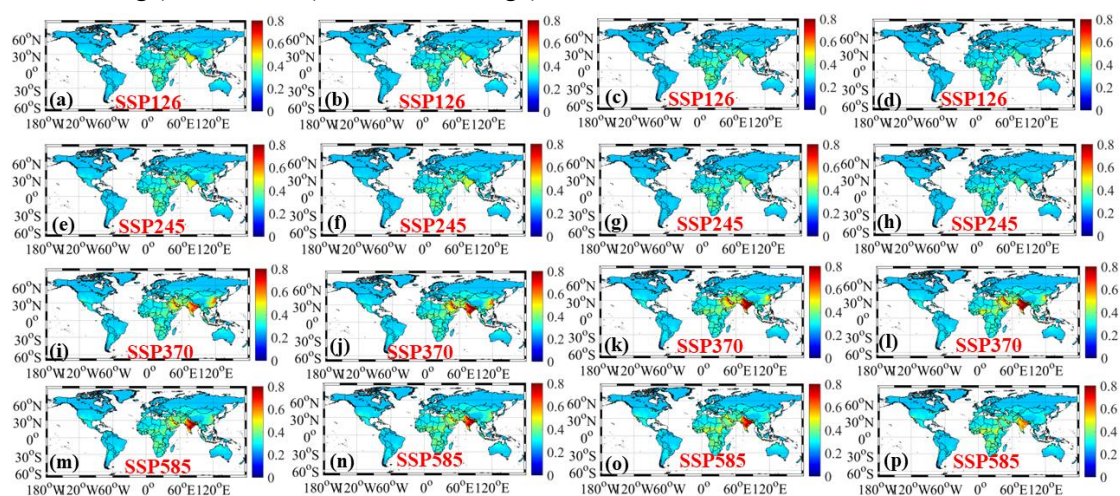

**Figure S15** Spatial variations of projected global ambient  $\text{NH}_3$  concentrations under different climate change scenarios (Unit:  $\mu\text{g N m}^{-3}$ ). Panels (a-d) represent the annual mean concentrations of  $\text{NH}_3$  concentrations for 2030s (2021-2050 average), 2050s (2041-2070 average), 2070s (2061-2090 average), and 2080s (2071-2100 average) under SSP1-2.6 scenarios. Panels (e-h) represent the annual mean concentrations of  $\text{NH}_3$  concentrations for 2030s (2021-2050 average), 2050s (2041-2070 average), 2070s (2061-2090 average), and 2080s (2071-2100 average) under SSP2-4.5 scenarios. Panels (i-l) represent the annual mean concentrations of  $\text{NH}_3$  concentrations for 2030s (2021-2050 average), 2050s (2041-2070 average), 2070s (2061-2090 average), and 2080s (2071-2100 average) under SSP3-7.0 scenarios. Panels (m-p) represent the annual mean concentrations of  $\text{NH}_3$  concentrations for 2030s (2021-2050 average), 2050s (2041-2070 average), 2070s (2061-2090 average), and 2080s (2071-2100 average) under SSP5-8.5 scenarios.

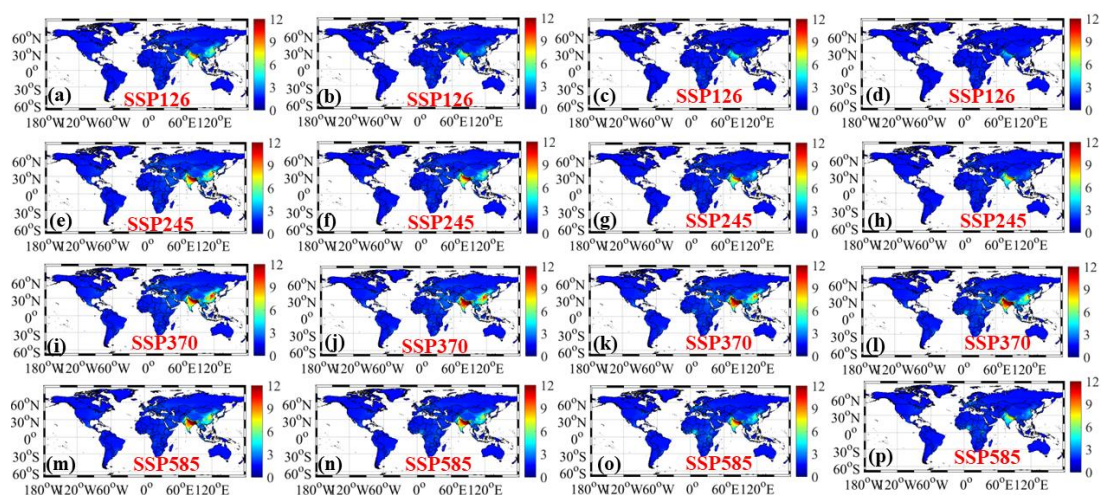

**Figure S16** Spatial variations of projected global ambient  $\text{NH}_4^+$  concentrations under different climate change scenarios (Unit:  $\mu\text{g N m}^{-3}$ ). Panels (a-d) represent the annual mean concentrations of  $\text{NH}_4^+$  concentrations for 2030s (2021-2050 average), 2050s (2041-2070 average), 2070s (2061-2090 average), and 2080s (2071-2100 average) under SSP1-2.6 scenarios. Panels (e-h) represent the annual mean concentrations of  $\text{NH}_4^+$  concentrations for 2030s (2021-2050 average), 2050s (2041-2070 average), 2070s (2061-2090 average), and 2080s (2071-2100 average) under SSP2-4.5 scenarios. Panels (i-l) represent the annual mean concentrations of  $\text{NH}_4^+$  concentrations for 2030s (2021-2050 average), 2050s (2041-2070 average), 2070s (2061-2090 average), and 2080s (2071-2100 average) under SSP3-7.0 scenarios. Panels (m-p) represent the annual mean concentrations of  $\text{NH}_4^+$  concentrations for 2030s (2021-2050 average), 2050s (2041-2070 average), 2070s (2061-2090 average), and 2080s (2071-2100 average) under SSP5-8.5 scenarios.

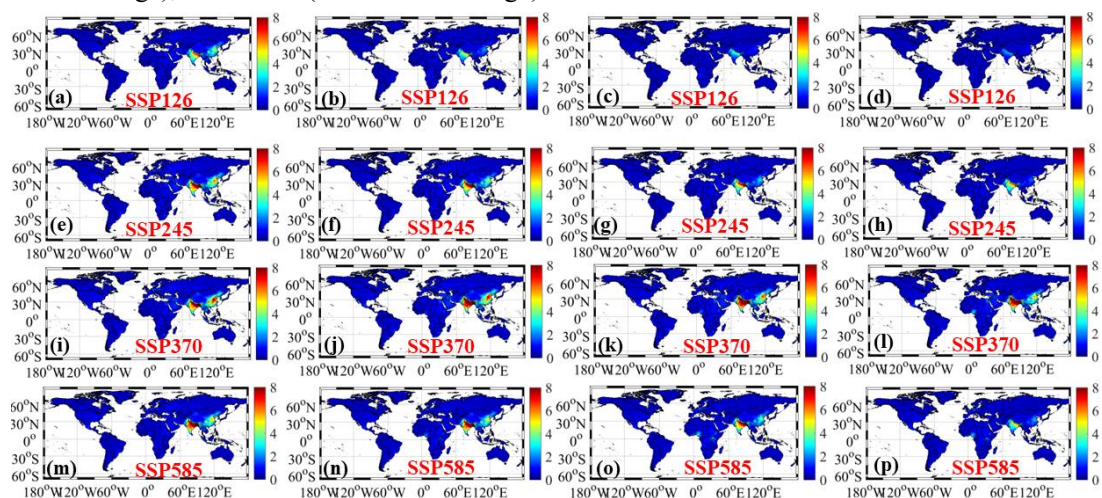

Supplement: Supplementary file 1 [file egusphere-2024-69-supplement.pdf]
